# Supplementary material for: Implications of dominance hierarchy on hummingbird-plant interactions in a temperate forest in Northwestern Mexico
Source: PeerJ journal article supplement (doi:10.7717/peerj.16245), 2023-10-17

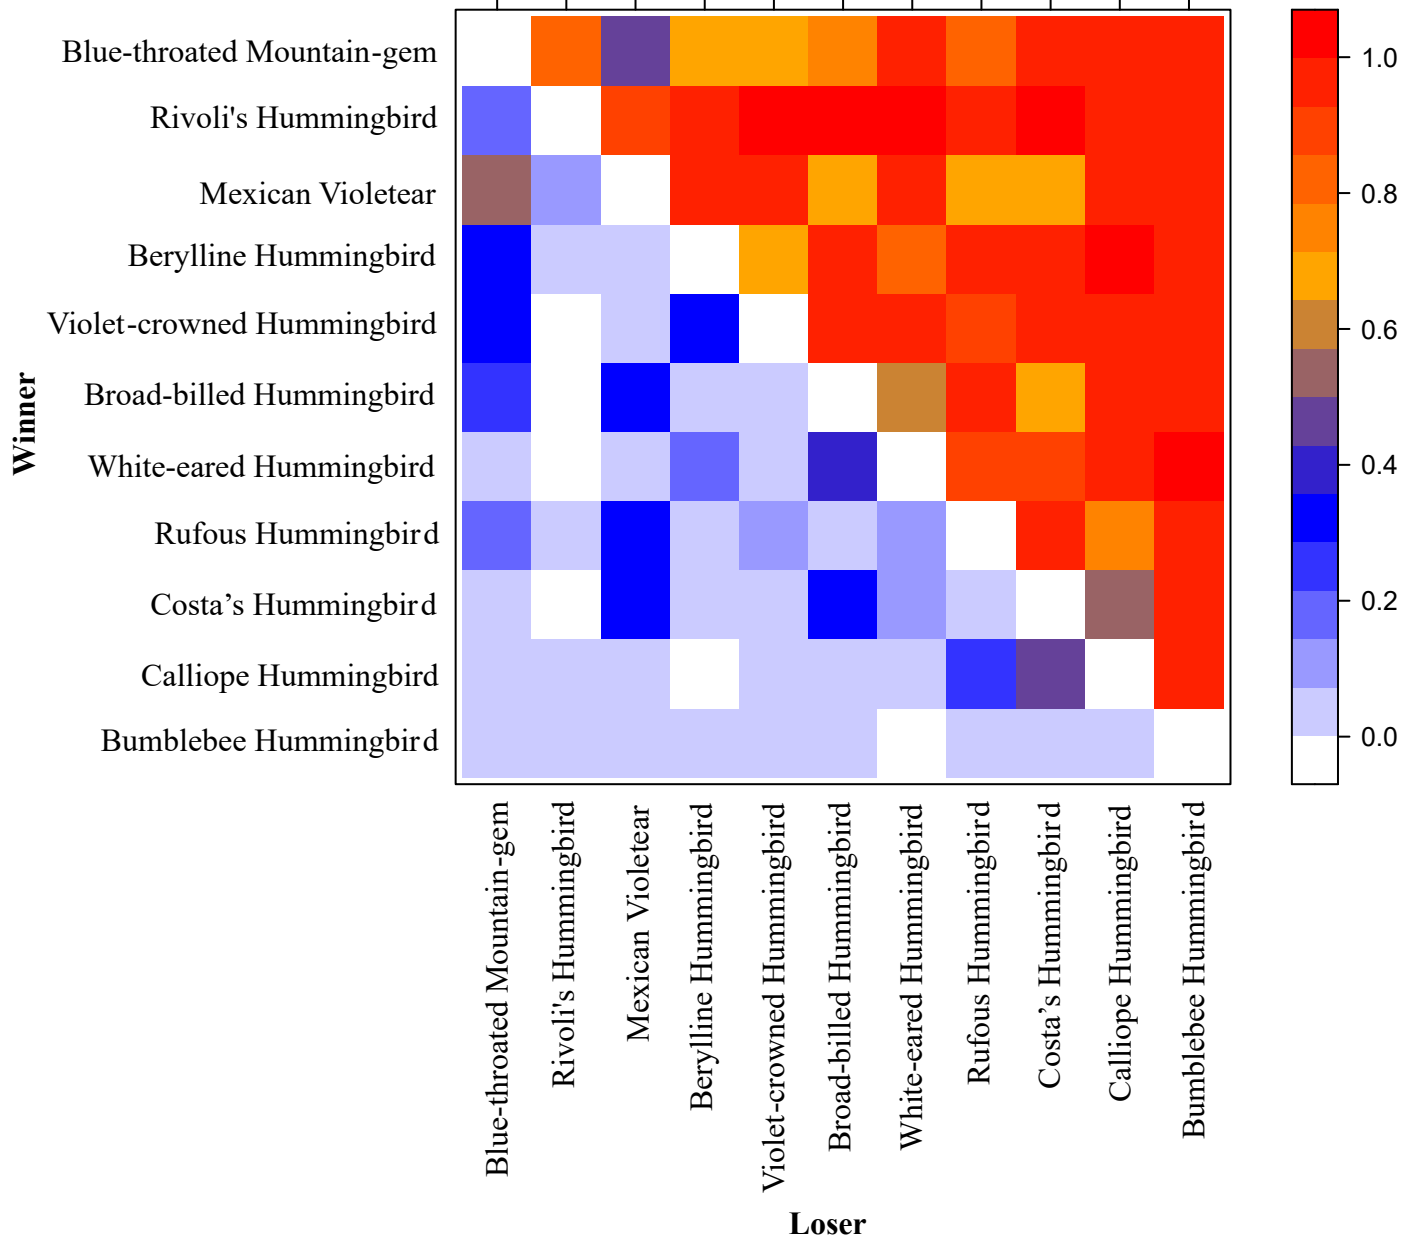

Supplement: Fig._S1.pdf [file Fig._S1.pdf]
